# Supplementary material for: A dynamic hard domain-induced self-healable waterborne poly(urethane/acrylic) hybrid dispersion for 3D printable biomedical scaffolds
Source: Royal Society of Chemistry journal article supplement (doi:10.1039/d3ma00607g), 2023-01-01
Supplement: d3ma00607g4.pdf [file d3ma00607g4.pdf]

## Electronic Supplementary Information

### Dynamic hard domain induced self-healable waterborne (polyurethane/acrylic) hybrid dispersions for 3D printable biomedical scaffolds

*Samiran Morang<sup>a</sup>, Jay Hind Rajput<sup>b</sup>, Atharva Poundarik<sup>b</sup>, Anwesha Mukherjee<sup>c</sup>, Bodhisatwa Das<sup>c</sup>, and Niranjan Karak<sup>\*a</sup>*

<sup>a</sup>Advanced Polymer and Nanomaterial Laboratory (APNL), Department of Chemical Sciences, Tezpur University, Napaam, 784028, Tezpur, Assam, India.

<sup>b</sup>Department of Metallurgical and Materials Engineering, Indian Institute of Technology Ropar, Punjab 140001, India

<sup>c</sup>Biomaterials and Tissue Engineering Lab, Department of Biomedical Engineering, Indian Institute of Technology Ropar, Punjab-140001, India

**\*Corresponding author, E-mail: [karakniranjan@gmail.com](mailto:karakniranjan@gmail.com)**

#### **Supporting Information Content**

11 Pages (including cover page)

8 Table

7 Figures

3 Movies

### **Preparation of the monoglyceride of castor oil (MG<sub>CO</sub>)**

MG<sub>CO</sub> was prepared by glycerolysis of ester according to an earlier reported method.<sup>1</sup> Briefly, 4.6 g of castor oil (5 mM), 0.55 g of glycerol (6 mM), and 0.0023 g (0.055 wt% of castor oil) of calcium oxide (CaO) were taken in a three-neck round bottom flask equipped with a thermometer, a mechanical stirrer, and a nitrogen inlet. The reaction was performed at 225±2 °C, and the solubility test (MG<sub>CO</sub>: methanol = 1:3, at room temperature) confirmed the completion of the reaction.

| <b>Reactants/<br/>Compositions</b> | <b>SWPUA-1</b> | <b>SWPUA-2</b> | <b>SWPUA-3</b> | <b>SWPUA-4</b> |
|------------------------------------|----------------|----------------|----------------|----------------|
| ε-PCL (mM)                         | 1              | 1              | 1              | 1              |
| DMPA (mM)                          | 1.5            | 1.5            | 1.5            | 1.5            |
| GECA (mM)                          | 0.375          | 0.375          | 0.375          | 0.375          |
| MG <sub>co</sub> (mM)              | 1              | 1              | 1              | 1              |
| 2-APDS (mM)                        | 0.80           | 0.80           | 0.80           | 0.80           |
| HMDA (mM)                          | 0.35           | 0.35           | 0.35           | 0.35           |
| IPDI (mM)                          | 6.65           | 6.65           | 6.65           | 6.65           |
| TEA (mM)                           | 1.575          | 1.575          | 1.575          | 1.575          |
| MMA (mM)                           | 44.145         | 35.316         | 35.316         | 22.073         |
| 2-HEA (mM)                         | 0              | 6.792          | 0              | 0              |
| GMA (mM)                           | 0              | 0              | 6.218          | 0              |
| BA (mM)                            | 0              | 0              | 0              | 17.241         |

**Table S1.** Recipes for the synthesis of SWPUAs with constant disulfide content (4.5 wt%).

**Table S2.** Various properties of monomers used in SWPUA preparation

| <b>Serial no</b> | <b>Properties</b>                       | <b><math>\epsilon</math>-PCL<sub>2000</sub></b> | <b>MMA</b> | <b>2-HEMA</b> |
|------------------|-----------------------------------------|-------------------------------------------------|------------|---------------|
| 1                | Molecular weight (g mol <sup>-1</sup> ) | 2000                                            | 100.121    | 130.143       |
| 2                | Melting point (°C)                      | 60                                              | -48        | -12           |
| 3                | Glass transition temperature (°C)       | -60                                             | -          | -             |
| 4                | Boiling point (°C)                      | -                                               | 101        | 250           |

**Table S3.** Particle size, zeta potential, and physical properties of SWPUAs and their films.

| Sample  | Appearance  | Z-average size (nm) | Zeta potential (mV) | Molecular weight       |                        | PDI   | Contact angle |
|---------|-------------|---------------------|---------------------|------------------------|------------------------|-------|---------------|
|         |             |                     |                     | M <sub>w</sub> (g/mol) | M <sub>n</sub> (g/mol) |       |               |
| SWPUA-1 | Milky white | 105.1               | -50.6               | 173265                 | 106876                 | 1.621 | 84.7°         |
| SWPUA-2 | Milky white | 135                 | -47.1               | 146783                 | 91281                  | 1.607 | 94.4°         |
| SWPUA-3 | Milky white | 109.6               | -50.0               | 151605                 | 91996                  | 1.647 | 86.1°         |
| SWPUA-4 | Milky white | 115                 | -60.4               | 150189                 | 92194                  | 1.629 | 86.5°         |

| Property                       | SWPUA-1   | SWPUA-2   | SWPUA-3   | SWPUA-4   |
|--------------------------------|-----------|-----------|-----------|-----------|
| Tensile strength (MPa)         | 7.28±0.5  | 9.56±0.3  | 8.53±0.7  | 4.58±0.5  |
| Strain (%)                     | 524±2     | 145±2     | 217±4     | 484±3     |
| Toughness (MJm <sup>-3</sup> ) | 34.43±0.8 | 12.65±0.5 | 15.12±0.5 | 19.52±0.7 |
| Scratch hardness (kg)          | 2±0.02    | 2±0.02    | 2±0.01    | 2±0.02    |
| T <sub>1</sub> (°C)            | 251.64    | 249.71    | 235.27    | 250.30    |
| T <sub>MAX</sub> (°C)          | 327.71    | 326.96    | 329.39    | 328.45    |
| T <sub>2</sub> (°C)            | 418.21    | 422.08    | 415.53    | 419.55    |
| T <sub>g</sub> (°C)            | 54.38     | 46.89     | 47.14     | 39.38     |

**Table S4.** Mechanical and thermal properties of SWPUAs.

**Table S5.** Time required (s) for healing of SWPUA films under microwave radiation.

| <b>Power (W)</b> | <b>SWPUA-1</b> | <b>SWPUA-2</b> | <b>SWPUA-3</b> | <b>SWPUA-4</b> |
|------------------|----------------|----------------|----------------|----------------|
| 800              | 300            | 330            | 300            | 300            |
| 700              | 390            | 400            | 380            | 390            |
| 600              | 520            | 550            | 520            | 530            |

**Table S6.** Mechanical strength data of the SWPUA films after healing.

| <b>Samples</b> | <b>Healing Cycle</b> | <b>Tensile strength (MPa)</b> | <b>Healing efficiency (%)</b> |
|----------------|----------------------|-------------------------------|-------------------------------|
| SWPUA-1        | 1 <sup>st</sup>      | 4.93±0.7                      | 67.71                         |
| SWPUA-2        | 1 <sup>st</sup>      | 5.30±0.2                      | 55.44                         |
| SWPUA-3        | 1 <sup>st</sup>      | 6.42±0.4                      | 75.26                         |
| SWPUA-4        | 1 <sup>st</sup>      | 3.78±0.2                      | 82.53                         |



**Table S7.** Mechanical data of the SWPUA films after reprocessing

| <b>Samples</b> | <b>Tensile strength (MPa)</b> | <b>Recycle efficiency (%)</b> | <b>Elongation at break (%)</b> | <b>Recycle efficiency (%)</b> |
|----------------|-------------------------------|-------------------------------|--------------------------------|-------------------------------|
| R1 SWPUA-1     | 6.02±0.3                      | 82.69                         | 360±5                          | 68.70                         |
| R1 SWPUA-2     | 8.85±0.2                      | 92.57                         | 126±2                          | 86.89                         |
| R1 SWPUA-3     | 7.83±0.2                      | 91.79                         | 189±2                          | 87.09                         |
| R1 SWPUA-4     | 3.55±0.4                      | 77.51                         | 417±2                          | 86.15                         |

| <b>Parameter/<br/>composition</b> | <b>Cuboid</b>                                    | <b>Disc</b>                                                                            |
|-----------------------------------|--------------------------------------------------|----------------------------------------------------------------------------------------|
| Dimension                         | 2.5 cm × 2.5 cm × 2 cm (Length × width × height) | 1.5 cm (ID), 2.9 cm (OD), 0.5 cm (Thickness)                                           |
| Solution A                        | GelMA 20% (w/v)/ SWPUA-2, (1:1, v/v)             | GelMA 20% (w/v)/ SWPUA-2, (1:1, v/v)                                                   |
| Solution B                        | Gelatin 20% (w/v)                                | Gelatin 20% (w/v)                                                                      |
| Ink composition                   | Solution A/ Solution B (0.6:0.4, v/v)            | Solution A/ Solution B (0.6:0.4, v/v), added a few drops of bromophenol blue indicator |
| Layer height                      | 0.35 mm                                          | 0.25                                                                                   |
| Shell Thickness                   | 0.40 mm                                          | 0.30                                                                                   |
| Fill density                      | 20%                                              | 15%                                                                                    |
| Flow rate                         | 20%                                              | 20%                                                                                    |
| Printing speed                    | 6.0 mm/s                                         | 8.0 mm/s                                                                               |

**Table 8.** Optimized ink composition and machine parameters of the 3D printing.

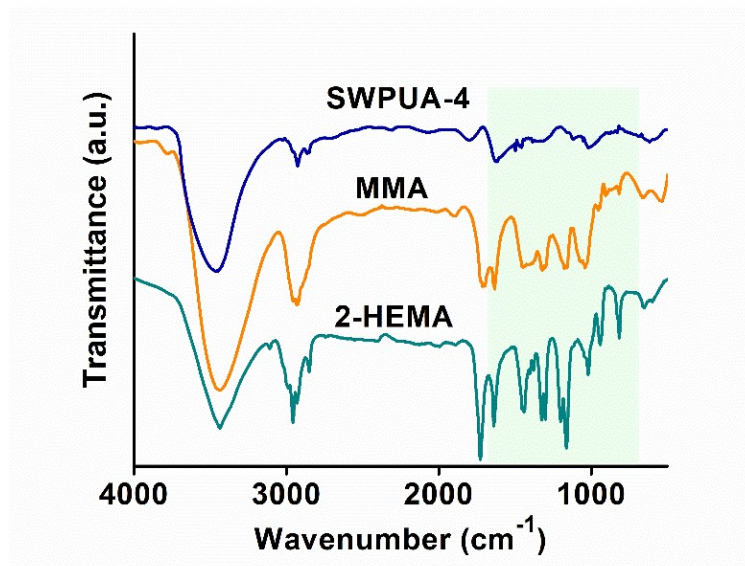

**Fig S1.** FTIR spectra of SWPUA-4, MMA monomer, and 2-HEMA monomer.

Again, verification of the presence of acrylate functionality (moiety) in SWPUA is indirectly proof from FTIR analysis. In an acrylate monomer, there is only C=C bond and –(C=O)-R (ester) groups are present as the primary functional groups. However, there would be no C=C bond after the free radical polymerization, which converted into C–C bond. Additionally, ester groups are not only present in acrylate moieties but also present in other moieties e.g., GECA, so it is very difficult to assigned them for a particular moiety after the polymerization. An FTIR spectra of MMA monomer, 2-HEMA, and SWPUA-4 was added in the ESI for demonstrating the change occurred in various vibrational frequencies before and after the polymerization. Specifically, absence of two peaks near  $1638\text{ cm}^{-1}$  and  $817\text{ cm}^{-1}$  corresponding to C=C bond stretching confirms the formation of interpenetrating polymer network (IPN) formation with polyurethane matrix.<sup>2</sup>

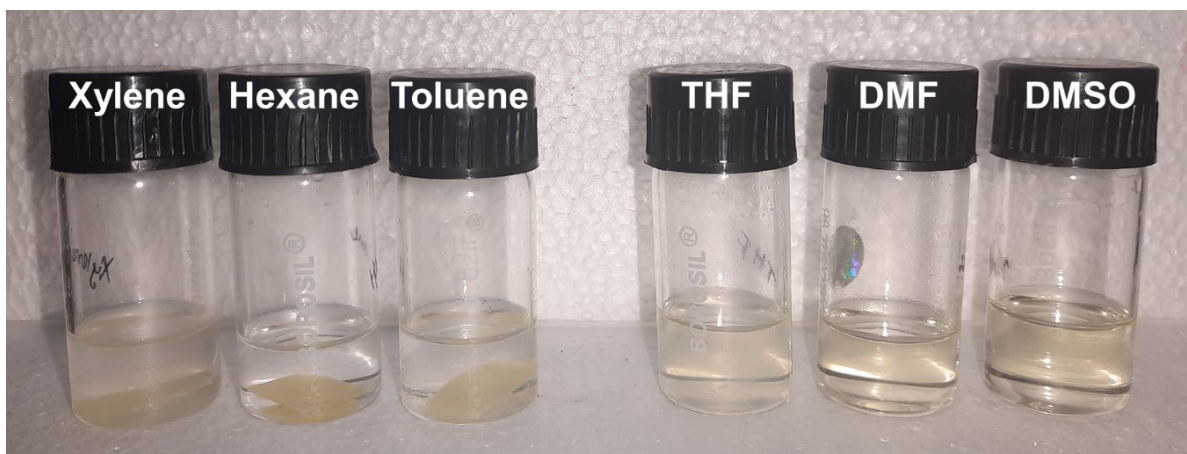

**Fig S2.** Solubility test of SWPUA-2 in various solvents.

It is pertinent to note that SWPUA consists of polyurethane and polyacrylic chains which are virtually or physically cross-linked not via the chemical covalent bond formation. Again, as SWPUA consists of enormous polar group such as ester, carbamate, urea, etc., so there are several polar-polar interactions present between the SWPUA system and polar solvent. These interactions lead to ionic/polar disintegration of polymeric chain and make the SWPUA soluble in the solvent.

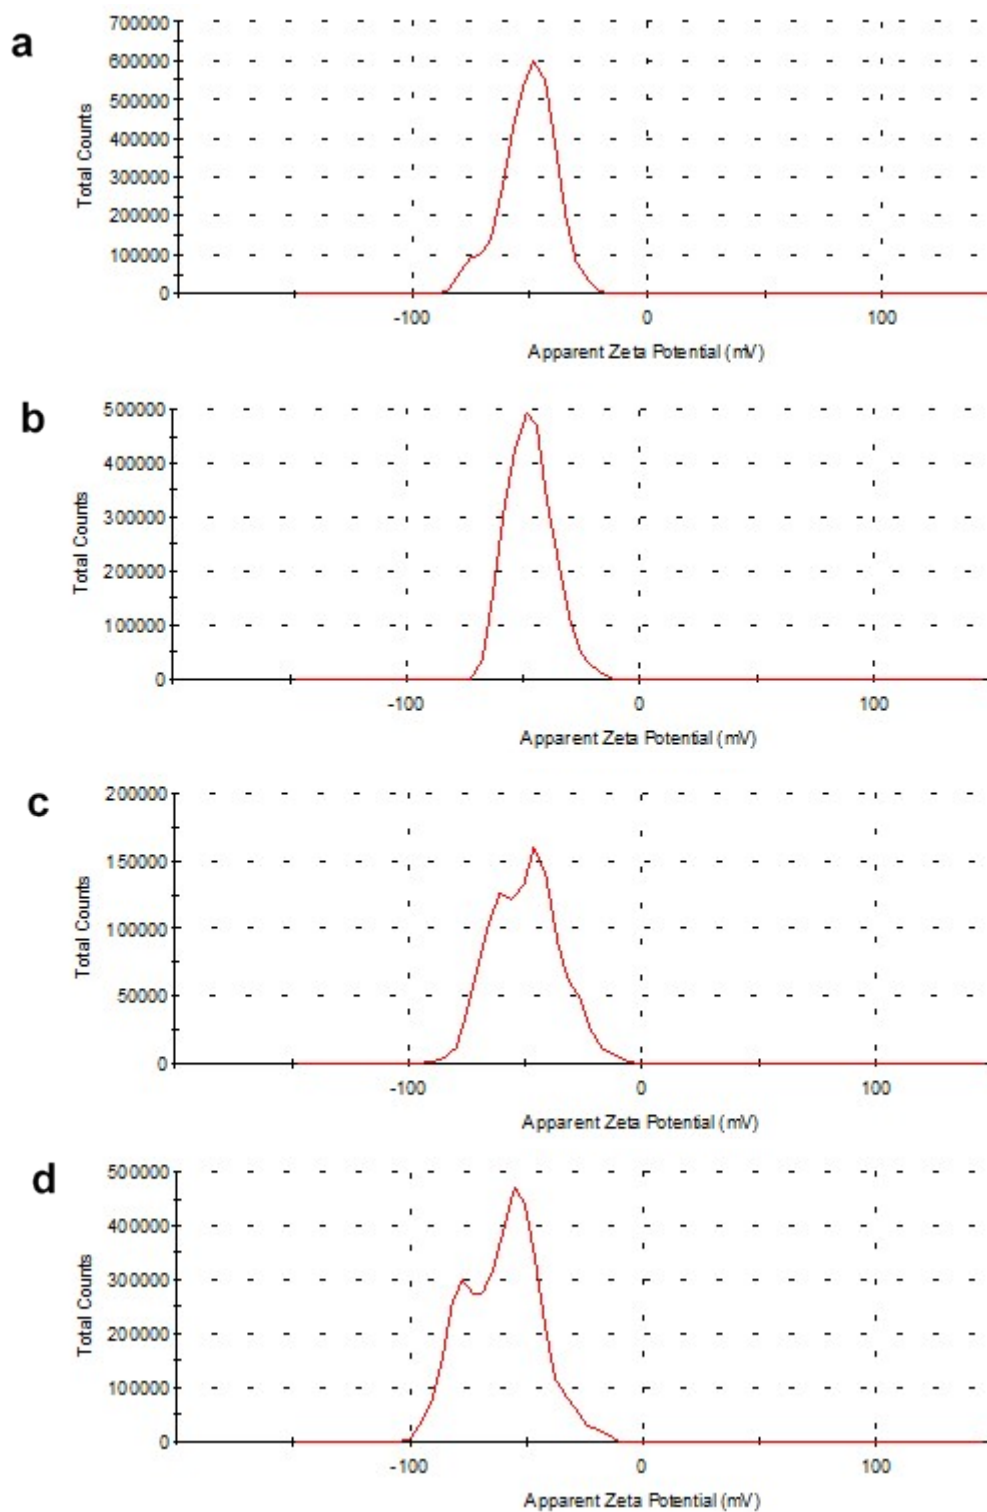

**Fig S3.** Zeta potential distribution curves for (a) SWPUA-1, (b) SWPUA-2, (c) SWPUA-3, and (d) SWPUA-4.

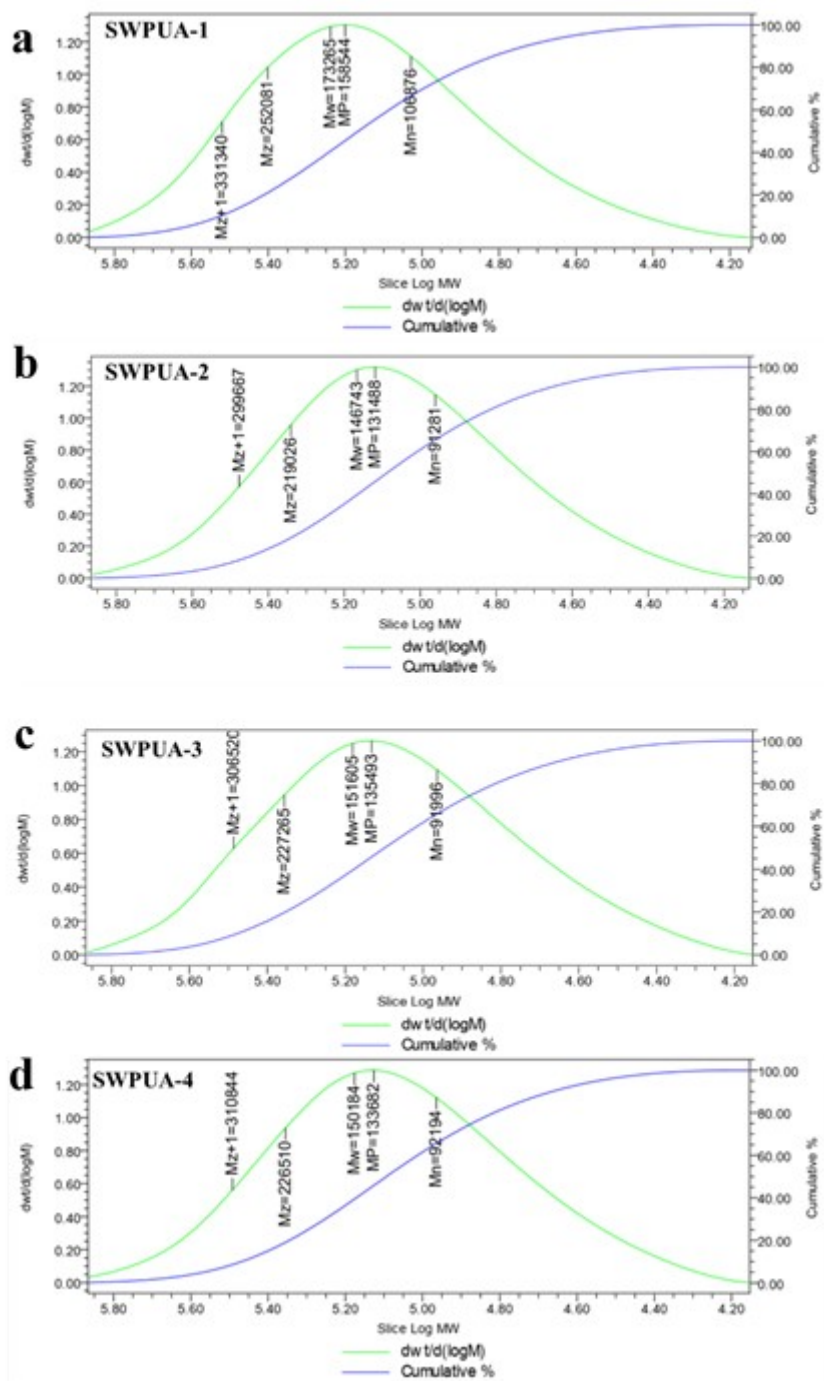

**Fig S4.** GPC chromatograms show average molecular weights of SWPUAs.

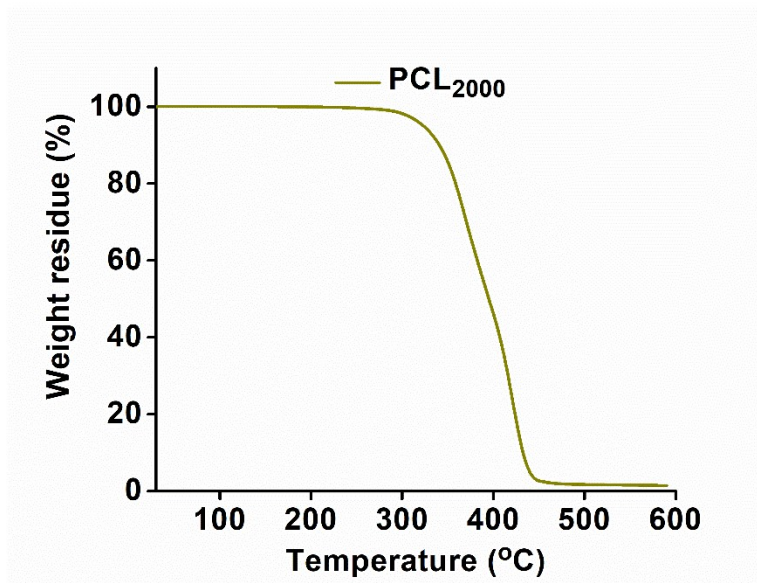

Fig S5. TGA curve of  $\epsilon$ -PCL<sub>2000</sub>

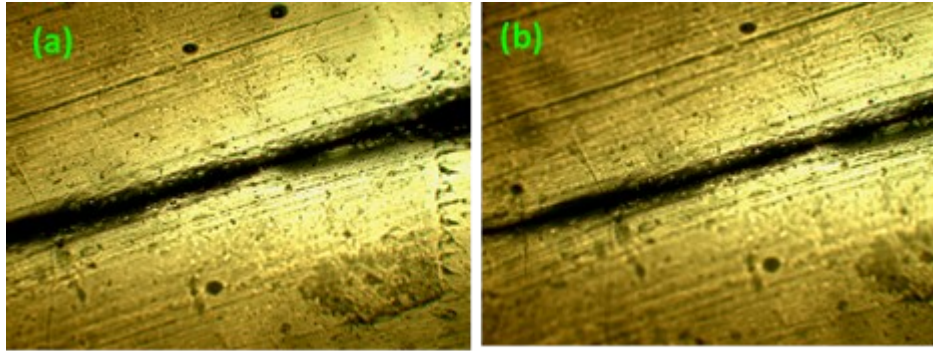

**Fig S6.** Optical microscopic images of PUA film (a) before and (c) after, healing test.



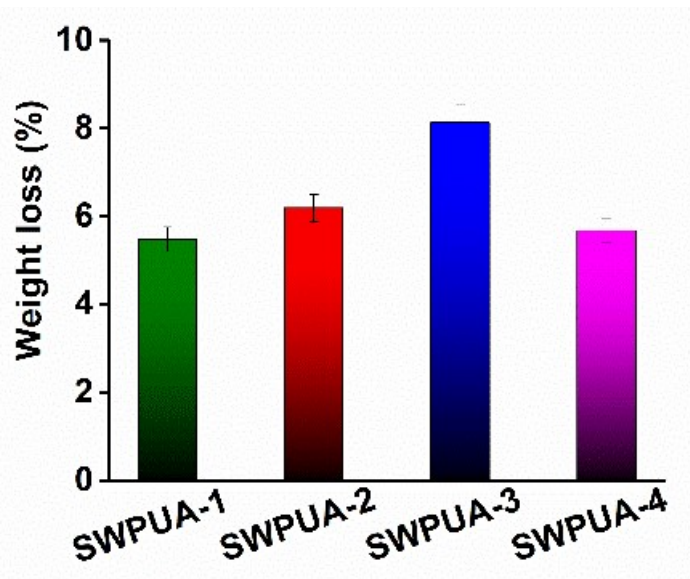

Fig S7. Weight loss (%) after 120 days of the soil burial test.

### Movies

1. **Movie S1.** This movie shows the toughness of SWPUA-2 which can successfully lift a load of 4 kg.
2. **Movie S2.** This movie shows the stretchability after the healing of SWPUA-2.
3. **Movie S3.** This movie shows the 3D printability nature of SWPUA-2/GelMA/Gelatin.

### References

1. H. Kalita and N. Karak, *J. Appl. Polym. Sci.*, 2014, **131**, 1–8.
2. D. Hamulić, P. Rodič, M. Poberžnik, M. Jereb, J. Kovač and I. Milošev, *Coatings*, 2020, **10**, 172.
